# Supplementary material
Source: Springer Nature journal article supplement (https://www.springermedizin.de/resource/supplementary/12881_2013_1124_MOESM1_ESM.pdf/9452024)
Supplement: MOESM1 [file 9452024]

Supplementary Table 1 Genotyping protocols for TCF7L2 rs7903146, KCNJ11 rs5219 and PPAR $\gamma$  rs1801282

| <b>SOP LightCycler LC480</b> |                         |                                                  |                         |                              |                 |
|------------------------------|-------------------------|--------------------------------------------------|-------------------------|------------------------------|-----------------|
| <b>Method</b>                |                         | <b>TCF7L2 rs7903146 [TCF4]</b>                   |                         |                              | TIB-Produkt Nr. |
| <b>Primer</b>                |                         |                                                  |                         |                              |                 |
| forward                      | <b>TCF4 S</b>           | GGT GAC AAA TTC ATG GGC TTT CT                   |                         |                              | 779752          |
| reverse                      | <b>TCF4 A</b>           | CGT CTG AAA ACT AAG GGT GAC TCA TA               |                         |                              | 779753          |
| <b>Probes</b>                |                         |                                                  |                         |                              |                 |
| Sensor                       | <b>Sensor C</b>         | LC640-CTT TTT AGA TAC TAT ATA ATT TAA TTG CCG-PH |                         |                              | 779757          |
| Anchor                       | <b>Anchor TCF4</b>      | GCT GTT ATT TAC TGA ACA ATT AGA GAG CTA AGC-FL   |                         |                              | 779754          |
| <b>PCR Mix</b>               |                         |                                                  |                         |                              |                 |
| <b>Component</b>             | <b>final Conc.</b>      | <b>1x</b>                                        | <b>100x</b>             |                              |                 |
| 5x Genotyping Master (Roche) | 0,5x                    | 1 $\mu$ l                                        | 100 $\mu$ l             |                              |                 |
| MgCl <sub>2</sub> (25mM)     | 3 mM                    | 0,6 $\mu$ l                                      | 60 $\mu$ l              |                              |                 |
| Primer f (10 $\mu$ M)        | 1,25 pmol               | 0,125 $\mu$ l                                    | 12,5 $\mu$ l            |                              |                 |
| Primer A (10 $\mu$ M)        | 5 pmol                  | 0,5 $\mu$ l                                      | 50 $\mu$ l              |                              |                 |
| Sensor (3 $\mu$ M)           | 1,5 pmol                | 0,5 $\mu$ l                                      | 50 $\mu$ l              |                              |                 |
| Anchor (3 $\mu$ M)           | 1,5 pmol                | 0,5 $\mu$ l                                      | 50 $\mu$ l              |                              |                 |
| H <sub>2</sub> O             |                         | 3,225 $\mu$ l                                    | 322,5 $\mu$ l           |                              |                 |
| Template DNA                 | ~ 30 ng/ $\mu$ l        | 1 $\mu$ l                                        |                         |                              |                 |
| <b>total volume/well</b>     |                         | <b>10 <math>\mu</math>l</b>                      |                         |                              |                 |
| <b>Setup</b>                 |                         |                                                  |                         |                              |                 |
| <b>Detection Format</b>      | <b>Block Type</b>       |                                                  | <b>Reaction Volume</b>  |                              |                 |
| Mono Color HybProbe          | 96                      |                                                  | 10                      |                              |                 |
| <b>Program</b>               |                         |                                                  |                         |                              |                 |
| <b>Program Name</b>          | <b>Cycles</b>           |                                                  | <b>Analysis Mode</b>    |                              |                 |
| Pre-Incubation               | 1                       |                                                  | None                    |                              |                 |
| Amplification                | 40                      |                                                  | Quantification          |                              |                 |
| Melting Curve                | 1                       |                                                  | Melting Curves          |                              |                 |
| Cooling                      | 1                       |                                                  | None                    |                              |                 |
| <b>Temperature Targets</b>   |                         |                                                  |                         |                              |                 |
| <b>Target ( °C)</b>          | <b>Acquisition Mode</b> | <b>Hold (hh:mm:ss)</b>                           | <b>Ramp Rate (°C/s)</b> | <b>Acquisitions (per °C)</b> |                 |
| <b>Pre-Incubation</b>        |                         |                                                  |                         |                              |                 |
| 95                           | None                    | 00:10:00                                         | 4.4                     | -                            |                 |
| <b>Amplification</b>         |                         |                                                  |                         |                              |                 |
| 95                           | None                    | 00:00:05                                         | 4.4                     | -                            |                 |
| 60                           | Single                  | 00:00:20                                         | 1.5                     | -                            |                 |
| 72                           | None                    | 00:00:10                                         | 4.4                     | -                            |                 |
| <b>Melting Curve</b>         |                         |                                                  |                         |                              |                 |
| 95                           | None                    | 00:00:30                                         | 4.4                     | -                            |                 |
| 60                           | None                    | 00:00:30                                         | 1.5                     | -                            |                 |
| 53                           | None                    | 00:00:30                                         | 1.5                     | -                            |                 |
| 45                           | None                    | 00:01:00                                         | 1.5                     | -                            |                 |
| 70                           | Continuous              | -                                                | -                       | 3                            |                 |
| <b>Cooling</b>               |                         |                                                  |                         |                              |                 |
| 40                           | None                    | 00:00:30                                         | 2.2                     | -                            |                 |

## SOP LightCycler LC480

| SOP LightCycler LC480        |                         |                                     |                         |                              |                 |
|------------------------------|-------------------------|-------------------------------------|-------------------------|------------------------------|-----------------|
| Method                       | KCNJ11 <b>rs5219</b>    |                                     |                         |                              | TIB-Produkt Nr. |
| <b>Primer</b>                |                         |                                     |                         |                              |                 |
| forward                      | <b>KCNJ f</b>           | GGG GTC ACC GGA GCC AT              |                         |                              | 1141215         |
| reverse                      | <b>KCNJ A</b>           | TGT GGG CCA CGT TGC A               |                         |                              | 1141217         |
| <b>Probes</b>                |                         |                                     |                         |                              |                 |
| Sensor                       | <b>Sensor [A]</b>       | AGG ACC CTG CCA AGC CCA—FL          |                         |                              | 1141219         |
| Anchor                       | <b>Anchor</b>           | LC640—TAC CGT GCC CGC CAG CGG AG—PH |                         |                              | 1141220         |
| <b>PCR Mix</b>               |                         |                                     |                         |                              |                 |
| <b>Component</b>             | <b>final Conc.</b>      | <b>1x</b>                           | <b>100x</b>             |                              |                 |
| 5x Genotyping Master (Roche) | 0,5x                    | 1 µl                                | 100 µl                  |                              |                 |
| MgCl <sub>2</sub> (25mM)     | 3 mM                    | 0,6 µl                              | 60 µl                   |                              |                 |
| Primer f (10µM)              | 1,25 pmol               | 0,125 µl                            | 12,5 µl                 |                              |                 |
| Primer A (10µM)              | 5 pmol                  | 0,5 µl                              | 50 µl                   |                              |                 |
| Sensor (3µM)                 | 1,5 pmol                | 0,5 µl                              | 50 µl                   |                              |                 |
| Anchor (3µM)                 | 1,5 pmol                | 0,5 µl                              | 50 µl                   |                              |                 |
| H <sub>2</sub> O             |                         | 3,225 µl                            | 322,5 µl                |                              |                 |
| Template DNA                 | ~ 30 ng/µl              | 1 µl                                |                         |                              |                 |
| <b>total volume/well</b>     |                         | <b>10 µl</b>                        |                         |                              |                 |
| <b>Setup</b>                 |                         |                                     |                         |                              |                 |
| <b>Detection Format</b>      | <b>Block Type</b>       |                                     | <b>Reaction Volume</b>  |                              |                 |
| Mono Color HybProbe          | 96                      |                                     | 10                      |                              |                 |
| <b>Program</b>               |                         |                                     |                         |                              |                 |
| <b>Program Name</b>          | <b>Cycles</b>           |                                     | <b>Analysis Mode</b>    |                              |                 |
| Pre-Incubation               | 1                       |                                     | None                    |                              |                 |
| Amplification                | 40                      |                                     | Quantification          |                              |                 |
| Melting Curve                | 1                       |                                     | Melting Curves          |                              |                 |
| Cooling                      | 1                       |                                     | None                    |                              |                 |
| <b>Temperature Targets</b>   |                         |                                     |                         |                              |                 |
| <b>Target ( °C)</b>          | <b>Acquisition Mode</b> | <b>Hold (hh:mm:ss)</b>              | <b>Ramp Rate (°C/s)</b> | <b>Acquisitions (per °C)</b> |                 |
| <b>Pre-Incubation</b>        |                         |                                     |                         |                              |                 |
| 95                           | None                    | 00:10:00                            | 4.4                     | -                            |                 |
| <b>Amplification</b>         |                         |                                     |                         |                              |                 |
| 95                           | None                    | 00:00:05                            | 4.4                     | -                            | } 40x           |
| 58                           | Single                  | 00:00:10                            | 1.5                     | -                            |                 |
| 72                           | None                    | 00:00:15                            | 4.4                     | -                            |                 |
| <b>Melting Curve</b>         |                         |                                     |                         |                              |                 |
| 95                           | None                    | 00:00:30                            | 4.4                     | -                            |                 |
| 66                           | None                    | 00:00:30                            | 1.5                     | -                            |                 |
| 57                           | None                    | 00:00:30                            | 1.5                     | -                            |                 |
| 45                           | None                    | 00:01:00                            | 1.5                     | -                            |                 |
| 75                           | Continuous              | -                                   | -                       | 3                            |                 |
| <b>Cooling</b>               |                         |                                     |                         |                              |                 |
| 40                           | None                    | 00:00:30                            | 2.2                     | -                            |                 |

## SOP LightCycler LC480

| Method                       |                         | hu PPARG rs1801282                                  |                         |                              | TIB-Produkt Nr. |
|------------------------------|-------------------------|-----------------------------------------------------|-------------------------|------------------------------|-----------------|
| <b>Primer</b>                |                         |                                                     |                         |                              |                 |
| forward                      | PPARGex1 S              | ATT TGG AAA CTG ATG TCT TGA CTC A                   |                         |                              | 779750          |
| reverse                      | PPARGin1 A              | CAA TAG CCG TAT CTG GAA GGA AC                      |                         |                              | 779751          |
| <b>Probes</b>                |                         |                                                     |                         |                              |                 |
| Sensor                       | Sensor [G]              | CTC CTA TTG ACG CAG AAA GCG-FL                      |                         |                              | 779755          |
| Anchor                       | PPARG Anc               | LC640-TCC TTC ACT GAT ACA CTG TCT GCA AAC ATA TC-PH |                         |                              | 779756          |
| <b>PCR Mix</b>               |                         |                                                     |                         |                              |                 |
| <b>Component</b>             | <b>final Conc.</b>      | <b>1x</b>                                           | <b>100x</b>             |                              |                 |
| 5x Genotyping Master (Roche) | 0,5x                    | 1 µl                                                | 100 µl                  |                              |                 |
| MgCl <sub>2</sub> (25mM)     | 3 mM                    | 0,6 µl                                              | 60 µl                   |                              |                 |
| Primer S (10µM)              | 1,25 pmol               | 0,125 µl                                            | 12,5 µl                 |                              |                 |
| Primer A (10µM)              | 5 pmol                  | 0,5 µl                                              | 50 µl                   |                              |                 |
| Sensor (3µM)                 | 1,5 pmol                | 0,5 µl                                              | 50 µl                   |                              |                 |
| Anchor (3µM)                 | 1,5 pmol                | 0,5 µl                                              | 50 µl                   |                              |                 |
| H <sub>2</sub> O             |                         | 3,225 µl                                            | 322,5 µl                |                              |                 |
| Template DNA                 | ~ 30 ng/µl              | 1 µl                                                |                         |                              |                 |
| <b>total volume/well</b>     |                         | <b>10 µl</b>                                        |                         |                              |                 |
| <b>Setup</b>                 |                         |                                                     |                         |                              |                 |
| <b>Detection Format</b>      | <b>Block Type</b>       |                                                     | <b>Reaction Volume</b>  |                              |                 |
| Mono Color HybProbe          | 96                      |                                                     | 10                      |                              |                 |
| <b>Program</b>               |                         |                                                     |                         |                              |                 |
| <b>Program Name</b>          | <b>Cycles</b>           |                                                     | <b>Analysis Mode</b>    |                              |                 |
| Pre-Incubation               | 1                       |                                                     | None                    |                              |                 |
| Amplification                | 40                      |                                                     | Quantification          |                              |                 |
| Melting Curve                | 1                       |                                                     | Melting Curves          |                              |                 |
| Cooling                      | 1                       |                                                     | None                    |                              |                 |
| <b>Temperature Targets</b>   |                         |                                                     |                         |                              |                 |
| <b>Target ( °C)</b>          | <b>Acquisition Mode</b> | <b>Hold (hh:mm:ss)</b>                              | <b>Ramp Rate (°C/s)</b> | <b>Acquisitions (per °C)</b> |                 |
| <b>Pre-Incubation</b>        |                         |                                                     |                         |                              |                 |
| 95                           | None                    | 00:10:00                                            | 4.4                     | -                            |                 |
| <b>Amplification</b>         |                         |                                                     |                         |                              |                 |
| 95                           | None                    | 00:00:05                                            | 4.4                     | -                            |                 |
| 58                           | Single                  | 00:00:15                                            | 1.5                     | -                            |                 |
| 72                           | None                    | 00:00:12                                            | 4.4                     | -                            |                 |
| <b>Melting Curve</b>         |                         |                                                     |                         |                              |                 |
| 95                           | None                    | 00:00:30                                            | 4.4                     | -                            |                 |
| 62                           | None                    | 00:00:30                                            | 1.5                     | -                            |                 |
| 54                           | None                    | 00:00:30                                            | 1.5                     | -                            |                 |
| 48                           | None                    | 00:01:00                                            | 1.5                     | -                            |                 |
| 75                           | Continuous              | -                                                   | -                       | 3                            |                 |
| <b>Cooling</b>               |                         |                                                     |                         |                              |                 |
| 40                           | None                    | 00:00:30                                            | 2.2                     | -                            |                 |

} 40x
